# Supplementary material
Source: MDPI journal article supplement (https://www.mdpi.com/2673-687X/3/4/25)
Supplement: s1 [file s1]

# PLLA Nanosheets for Wound Healing: Embedding with Iron-Ion-Containing Nanoparticles

Aslan Mussin <sup>1</sup>, Ali A. AlJulaih <sup>1</sup>, Neli Mintcheva <sup>1,2</sup>, Delvin Aman <sup>3</sup>, Satoru Iwamori <sup>1,4</sup>, Stanislav O. Gurbatov <sup>5</sup>,  
Abhishek K. Bhardwaj <sup>6</sup> and Sergei A. Kulinich <sup>1,4,\*</sup>

<sup>1</sup> Department of Mechanical Engineering, Tokai University, Hiratsuka, Kanagawa 259-1292, Japan

<sup>2</sup> Department of Chemistry, University of Mining and Geology, 1700 Sofia, Bulgaria

<sup>3</sup> Catalysis Division, Petroleum Refining Department, Egyptian Petroleum Research Institute, Cairo 11727, Egypt

<sup>4</sup> Research Institute of Science and Technology, Tokai University, Hiratsuka, Kanagawa 259-1292, Japan

<sup>5</sup> Institute of Automation and Control Processes, Far Eastern Branch, Russian Academy of Science, Vladivostok 690041, Russia

<sup>6</sup> Department of Environmental Science, Amity University, Gwalior 474005, Madhya Pradesh, India

\* Correspondence: skulinich@tokai-u.jp

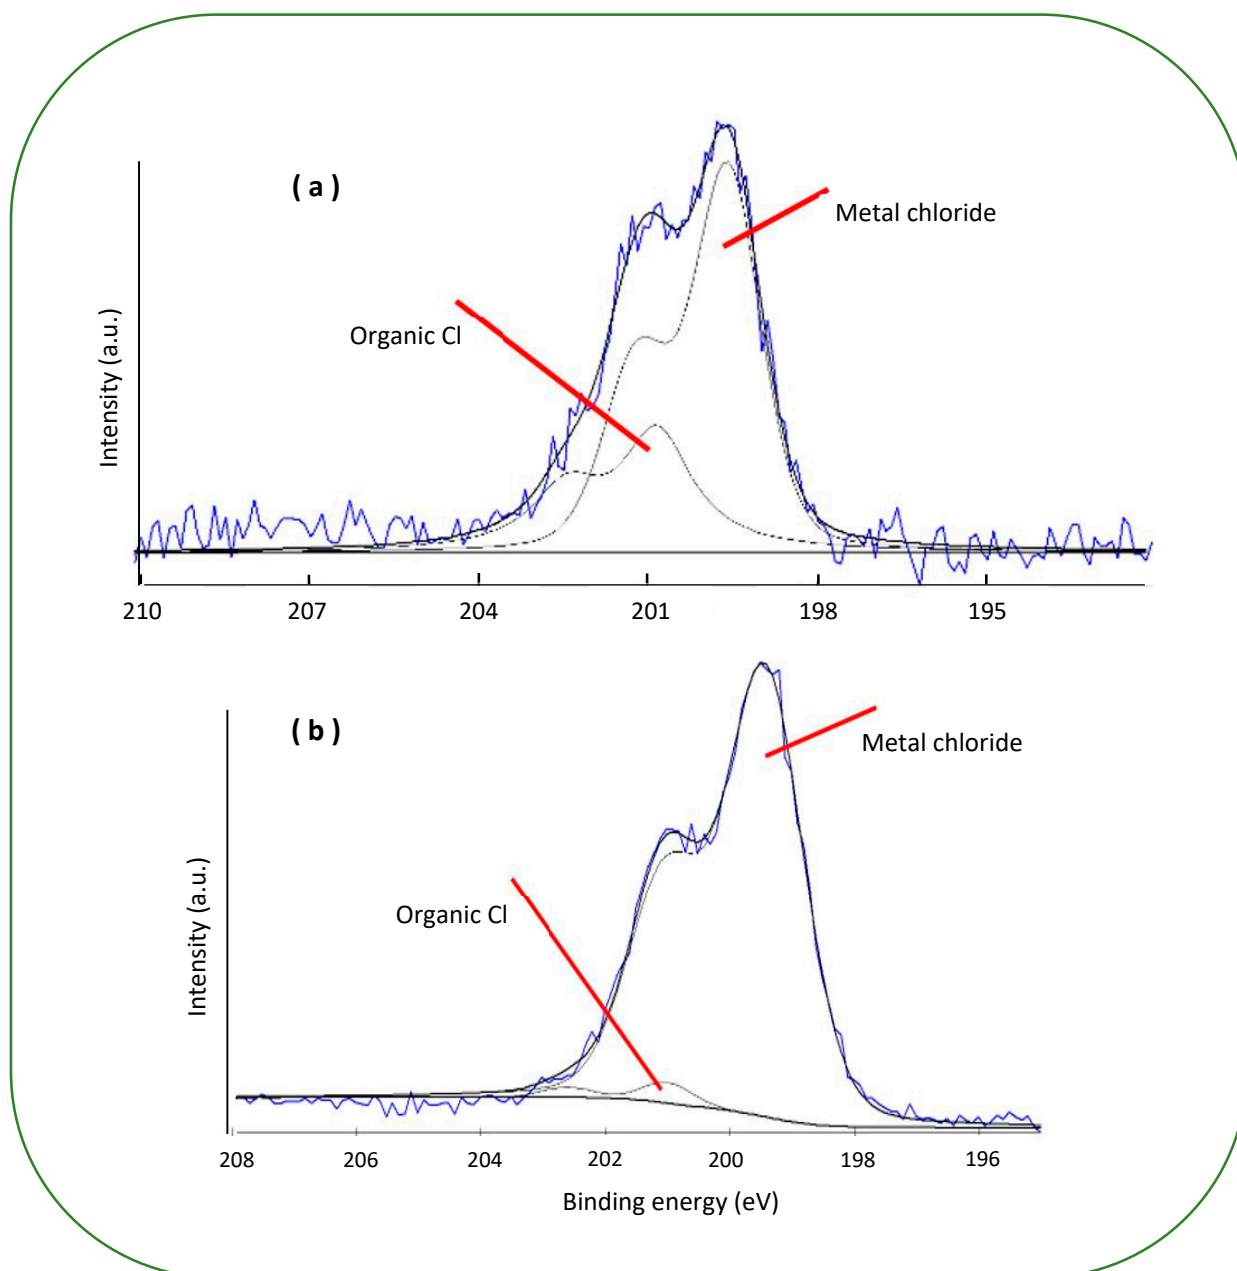

**Figure S1.** XPS Cl 2p spectra of Fe-containing NPs in Samples A (a) and B (b).

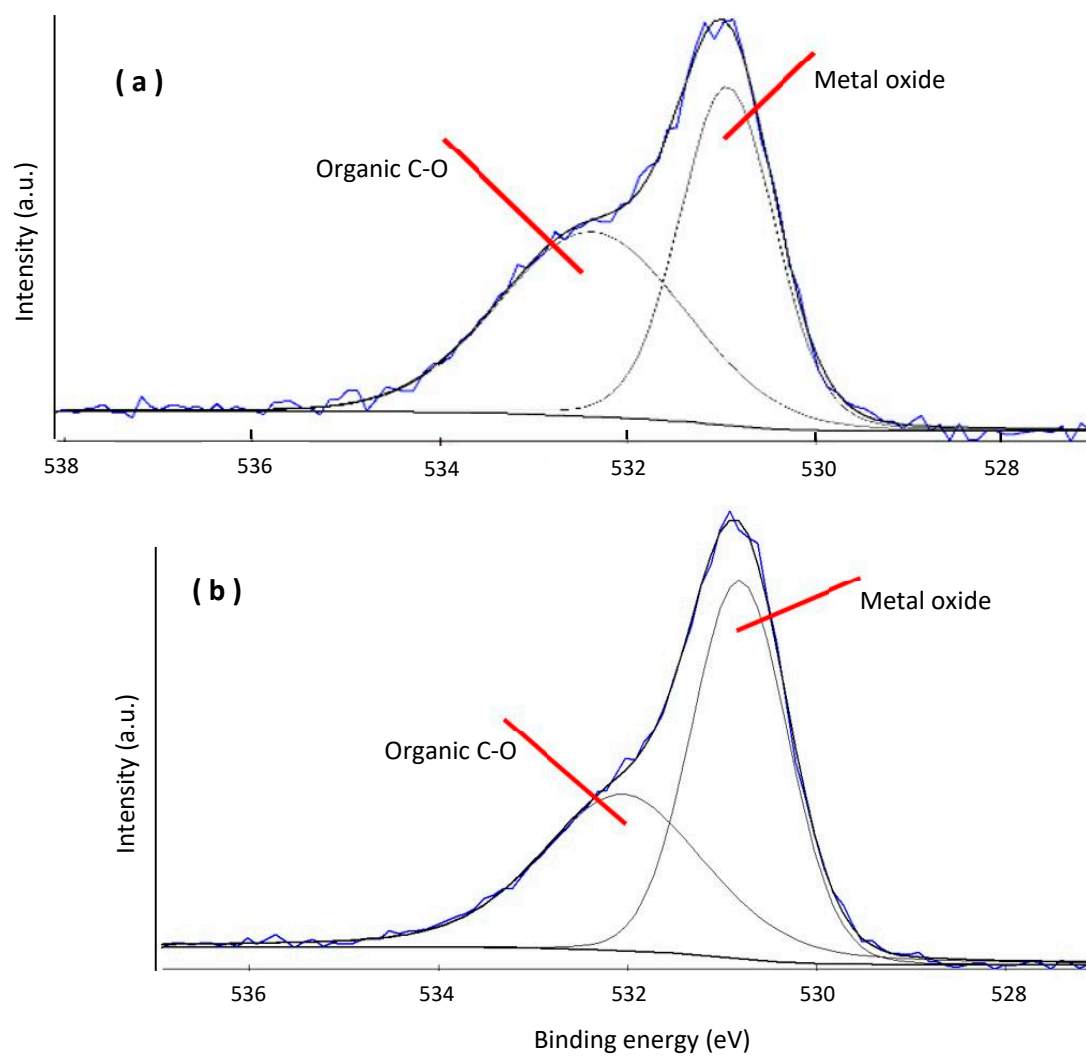

**Figure S2.** XPS O 1s spectra of Fe-containing NPs in Samples A (a) and B (b).

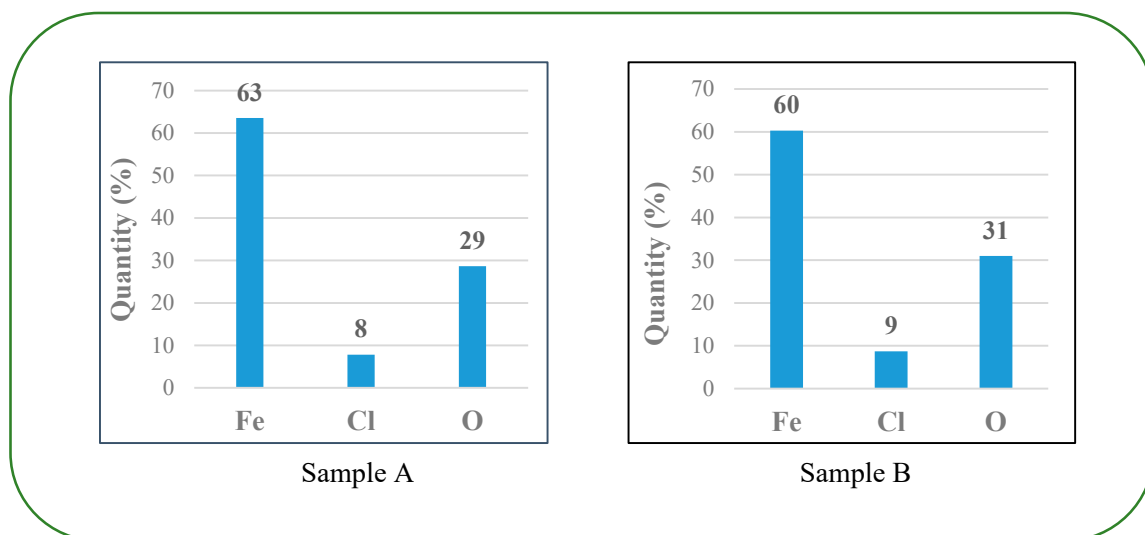

**Figure S3.** Elemental composition of Samples A and B prepared by LAL (as calculated based on XPS results).

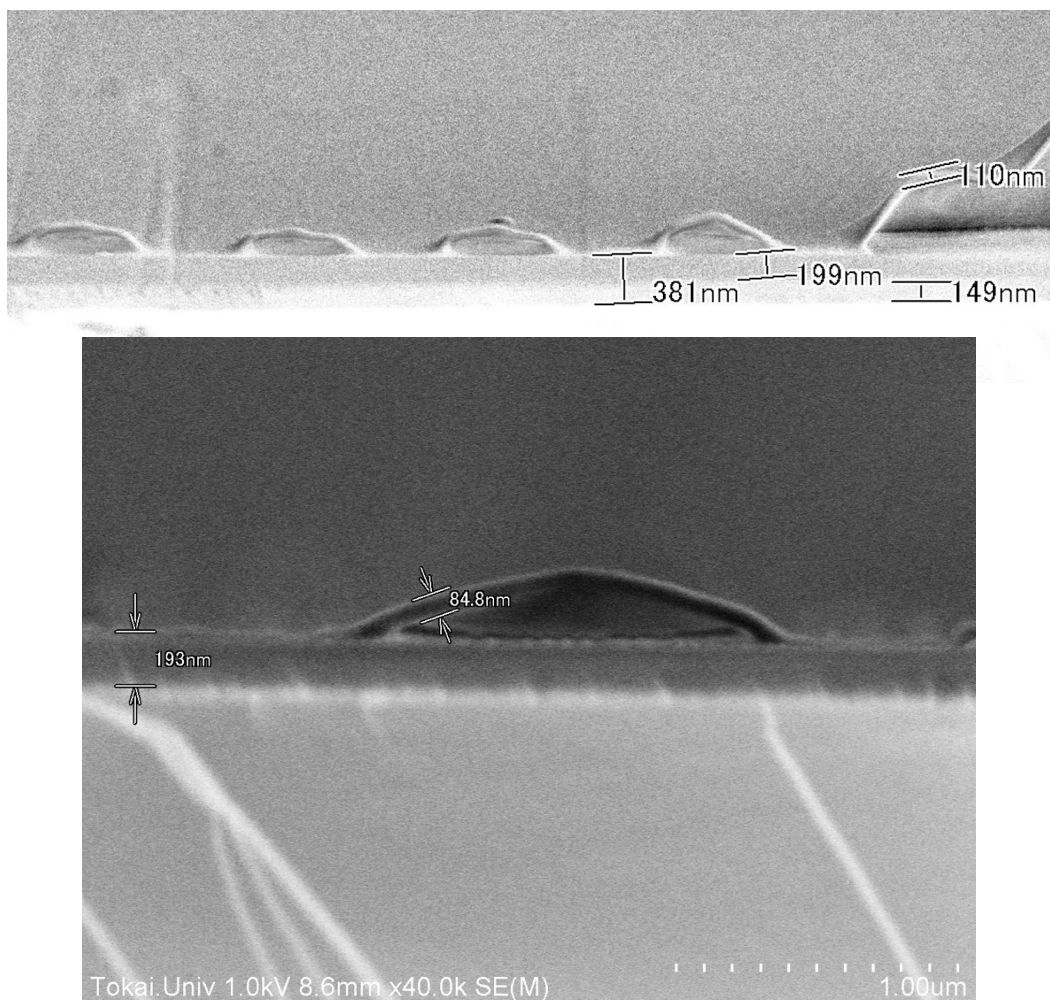

**Figure S4.** Cross-sectional SEM images of PLLA NSs incorporated with NSs. The nanosheets were spin-coated on Si substrate and have ~190-nm-thick PVA under-layer. In upper image: 110 nm shows cross-sectional thickness of PLLA sheet; 199 nm depicts thickness of PVA layer; 149 nm stands for strained Si wafer layer formed during breakage. In lower panel: 84.8 nm is thickness of PLLA sheet, while 193 nm depicts thickness of PVA layer plus PLLA layer on it.

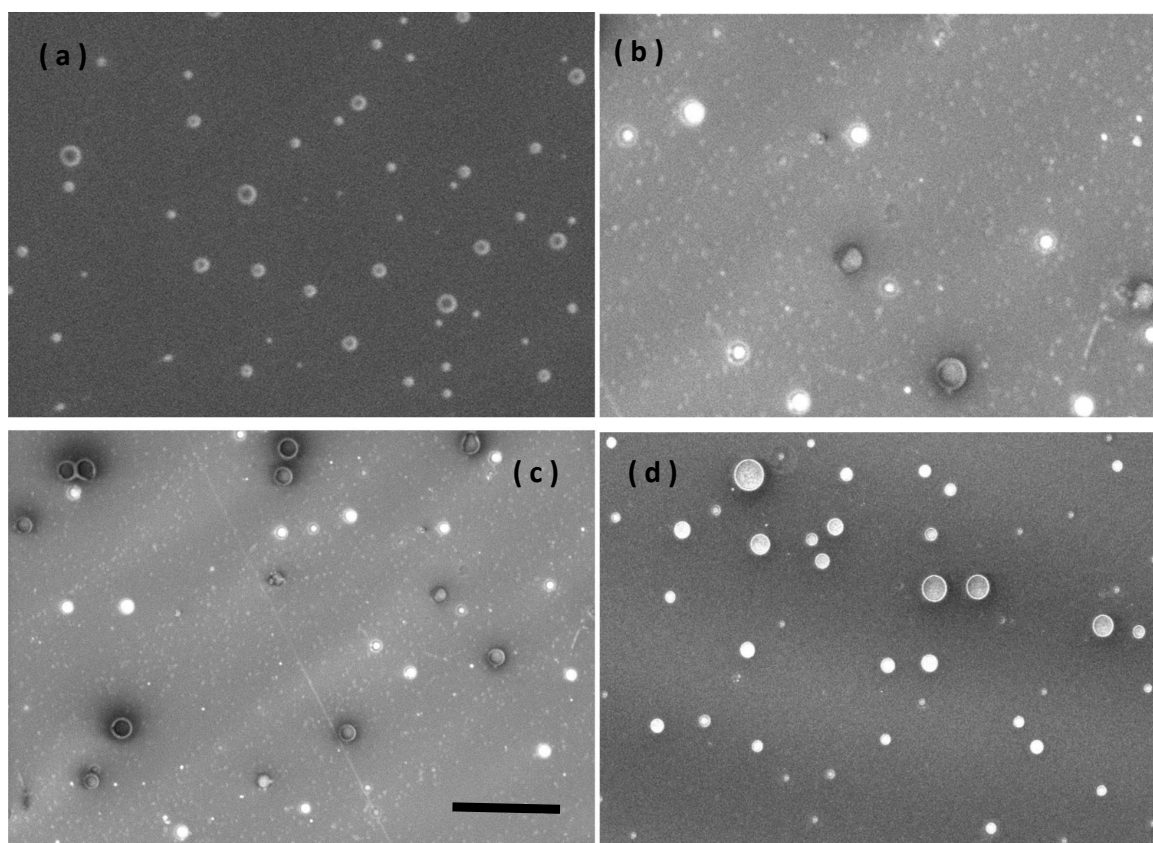

**Figure S5.** Surface images (SEM micrographs) of PLLA NSs loaded with Fe-containing (b,d) and with ZnO (a,c) NPs. Scale bar indicates 1  $\mu\text{m}$ .
